# Supplementary material for: Electronic modulation of composite electrocatalysts derived from layered NiFeMn triple hydroxide nanosheets for boosted overall water splitting
Source: Royal Society of Chemistry journal article supplement (doi:10.1039/c9nr07159h), 2019-01-01
Supplement: c9nr07159h1.pdf [file c9nr07159h1.pdf]

## ESI:

### **Electronic Modulation of Composite Electrocatalysts Derived from Layered NiFeMn Triple Hydroxide Nanosheets for Boosted Overall Water Splitting**

Lei Yan,<sup>‡a</sup> Yanrong Ren,<sup>‡a</sup> Xiaolong Zhang,<sup>‡b</sup> Yulin Sun,<sup>a</sup> Jiqiang Ning,<sup>c</sup> Yijun Zhong,<sup>a</sup> Botao Teng<sup>a</sup> and Yong Hu\*<sup>a</sup>

<sup>a</sup>Key Laboratory of the Ministry of Education for Advanced Catalysis Materials, Department of Chemistry, Zhejiang Normal University, Jinhua 321004, China. E-mail: [yonghu@zjnu.edu.cn](mailto:yonghu@zjnu.edu.cn); [yonghuzjnu@163.com](mailto:yonghuzjnu@163.com)

<sup>b</sup>Division of Nanomaterials & Chemistry, Hefei National Research Center for Physical Sciences at the Microscale, CAS Center for Excellence in Nanoscience, Hefei Science Center of CAS, Collaborative Innovation Center of Suzhou Nano Science and Technology, Department of Chemistry, University of Science and Technology of China, Hefei 230026, China.

<sup>c</sup>Vacuum Interconnected Nanotech Workstation, Suzhou Institute of Nano-Tech and Nano-Bionics, Chinese Academy of Sciences, Suzhou 215123, China.

<sup>†</sup>Electronic supplementary information (ESI) available. See DOI: <https://pubs.rsc.org/>

<sup>‡</sup> These authors contributed equally to this work.

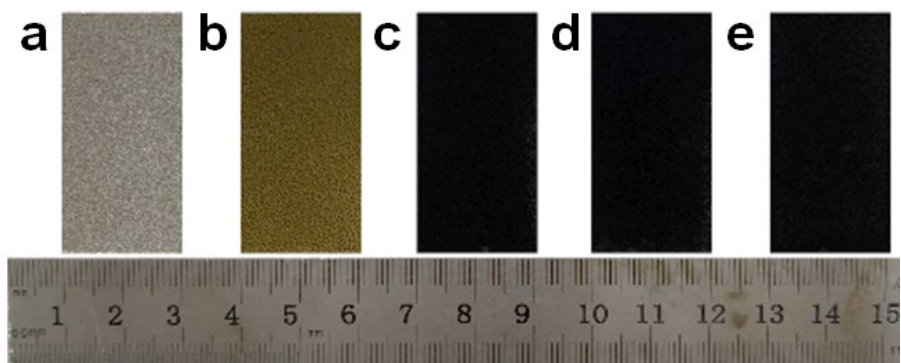

**Fig. S1** Photograph of (a) NF, (b) NiFeMn-LTH/NF, (c) NiFeMn-LTH/FM-NS/NF-4, (d) NiFeMn-LTH/FM-NS/NF-8, (e) FM-NS/NF electrodes.

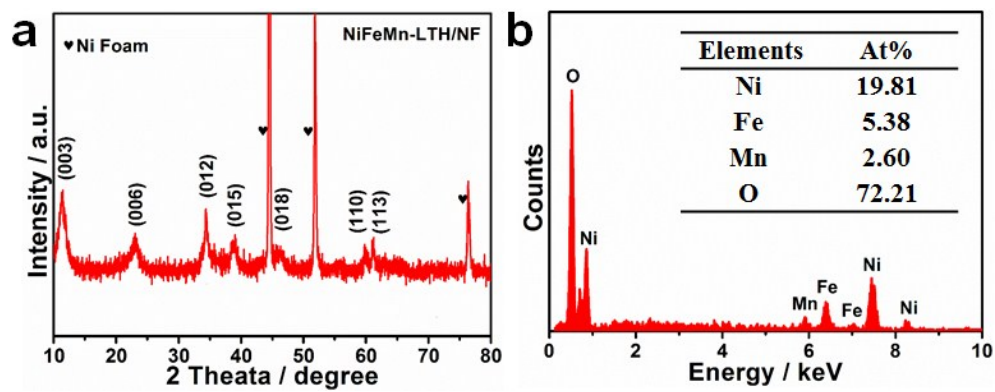

Fig. S2 (a) XRD pattern and (b) EDS spectrum of the as-prepared NiFeMn-LTH NSAs.

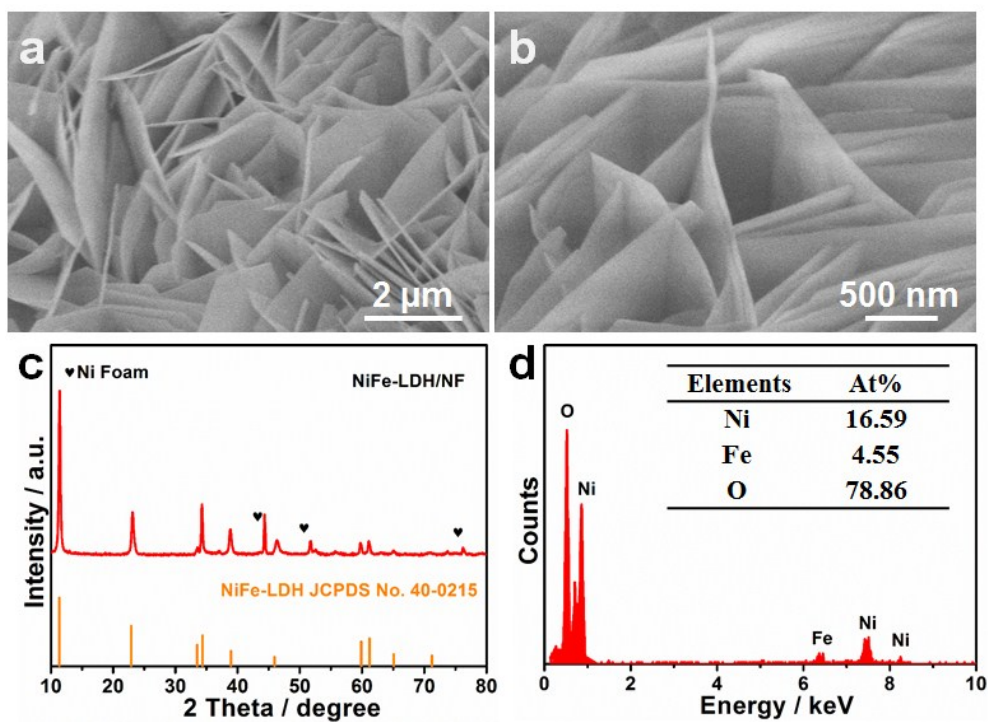

**Fig. S3** (a, b) SEM images, (c) XRD pattern and (d) EDS spectrum of the as-obtained NiFe-LDH NSAs.

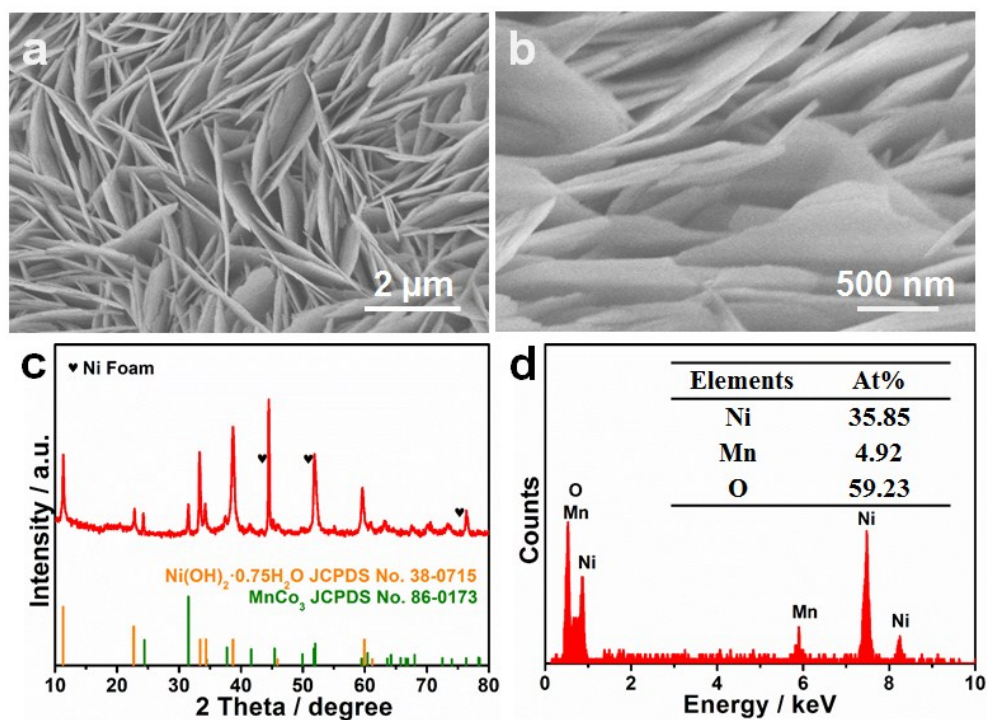

**Fig. S4** (a, b) SEM images, (c) XRD patterns and (d) EDS spectrum of the as-prepared Ni-Mn precursor NSAs.

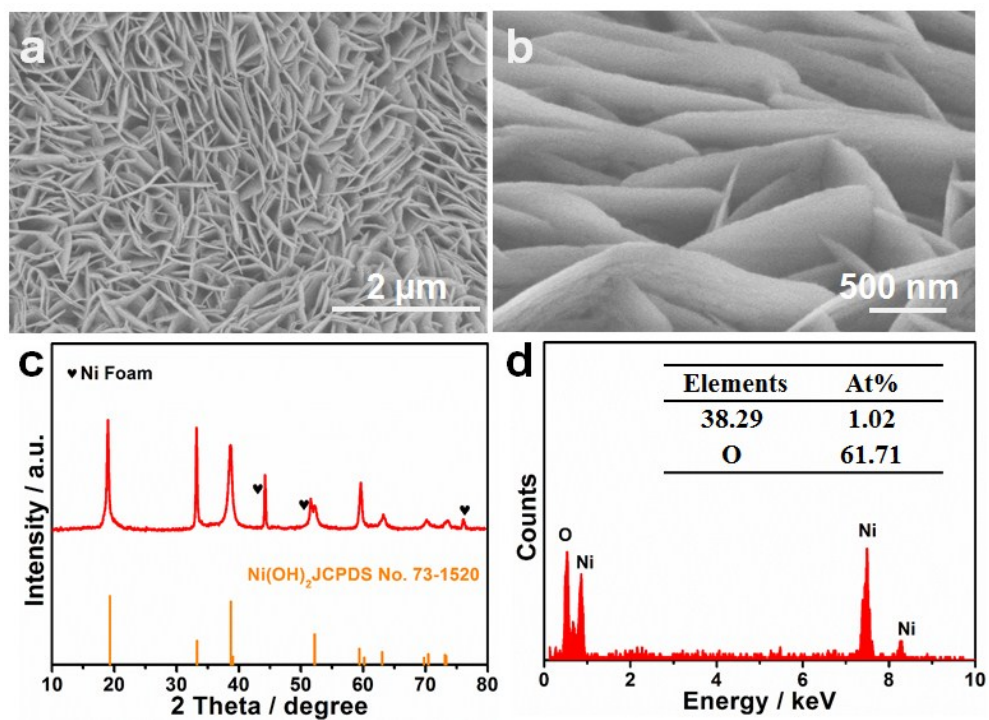

**Fig. S5** (a, b) SEM images, (c) XRD pattern and (d) EDS spectrum of the as-prepared  $\text{Ni(OH)}_2$  NSAs.

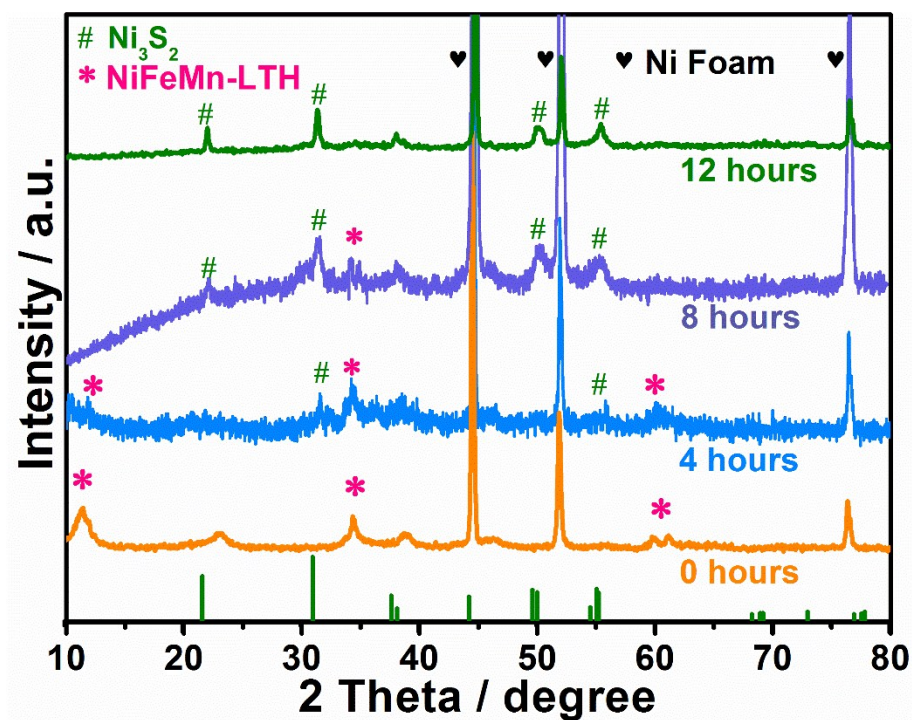

**Fig. S6** XRD patterns of the as-prepared NiFeMn-LDH, NiFeMn-LTH/FM-NS-4 HNSAs, NiFeMn-LTH/FM-NS-8 HNSAs and FM-NS NSAs.

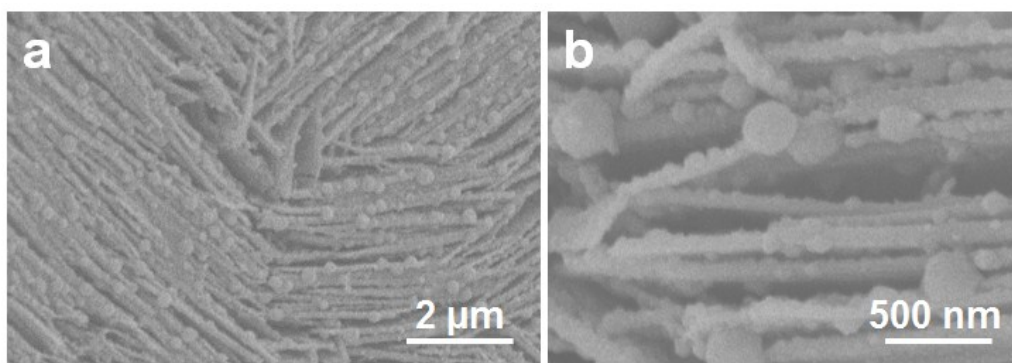

**Fig. S7** (a, b) SEM images of the as-prepared NiFeMn-LTH/FM-NS/NF-8 NSAs.



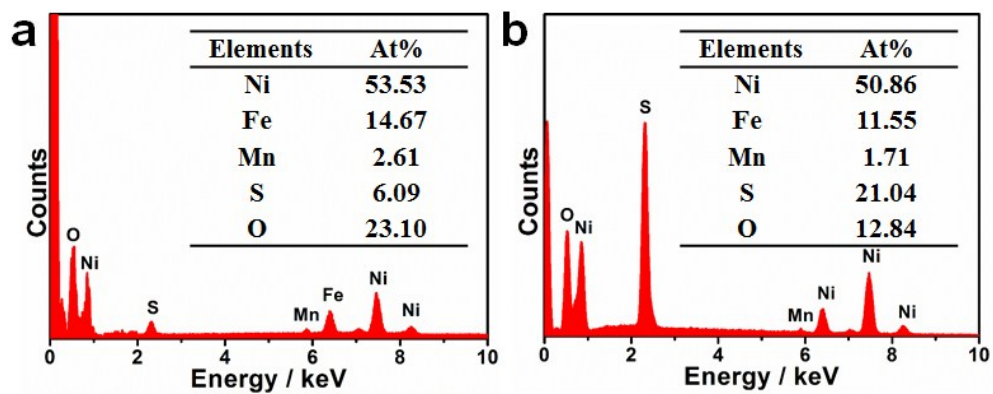

**Fig. S8** (a) EDS spectra of the as-prepared NiFeMn-LTH/FM-NS-4 HNSAs and (b) FM-NS NSAs.

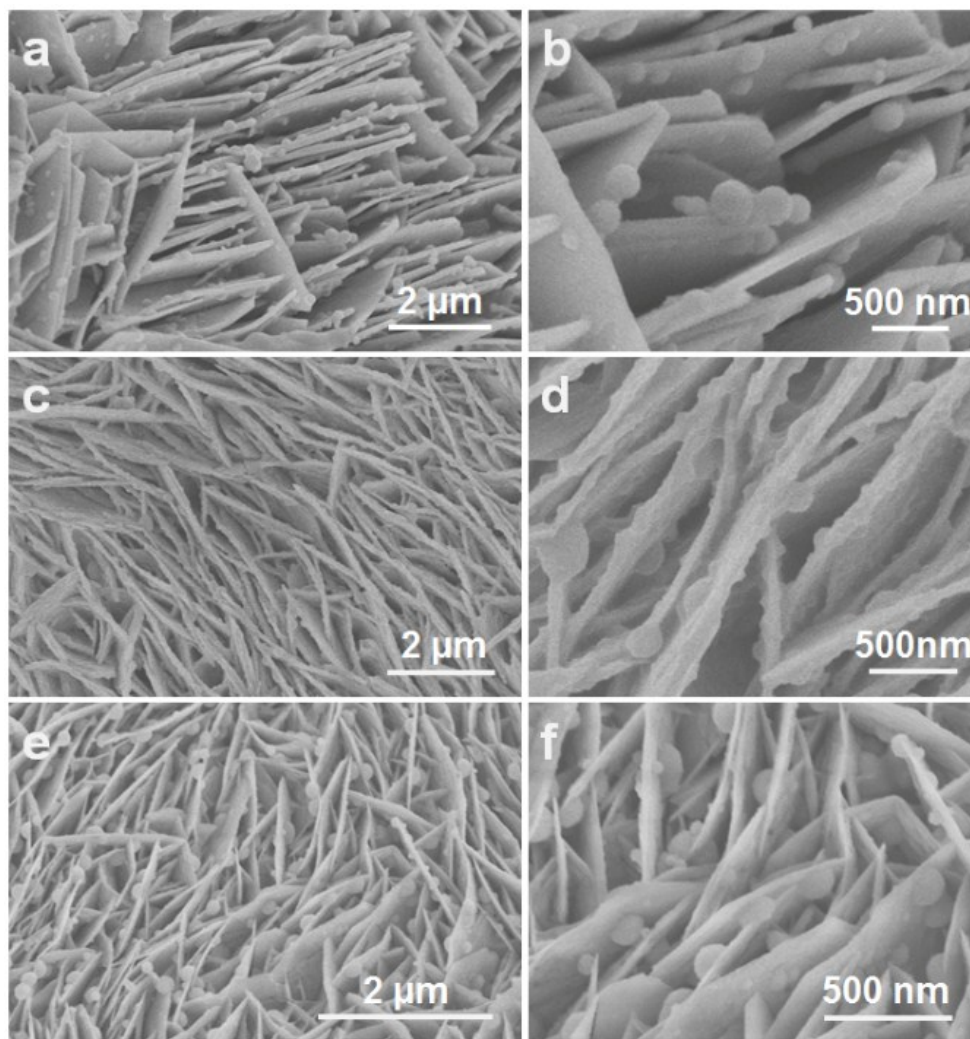

**Fig. S9** (a, b) SEM images of the as-prepared Fe-NS, (c, d) Mn-NS and (e, f) NS NSAs.

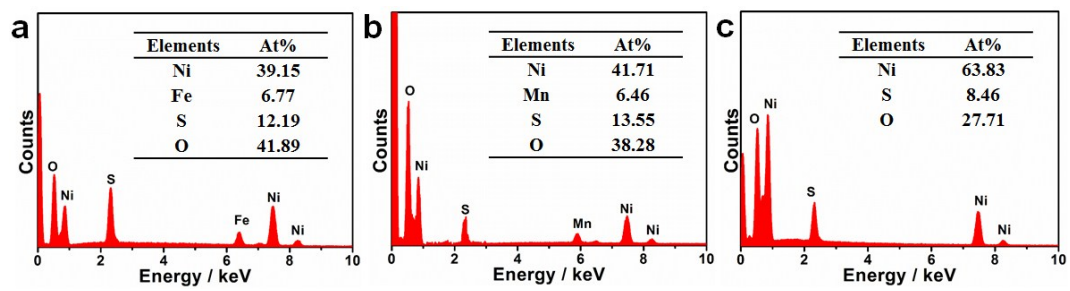

**Fig. S10** (a) EDS spectra of the as-prepared Fe-NS, (b) Mn-NS and (c) NS NSAs.

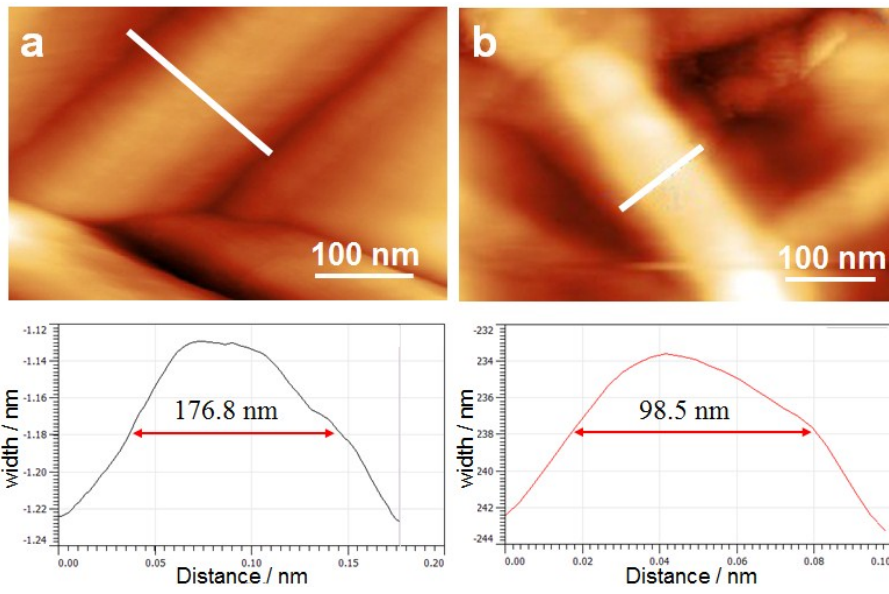

**Fig. S11** AFM images and the corresponding width profiles of (a) the FM-NS and (b) NS NSAs.

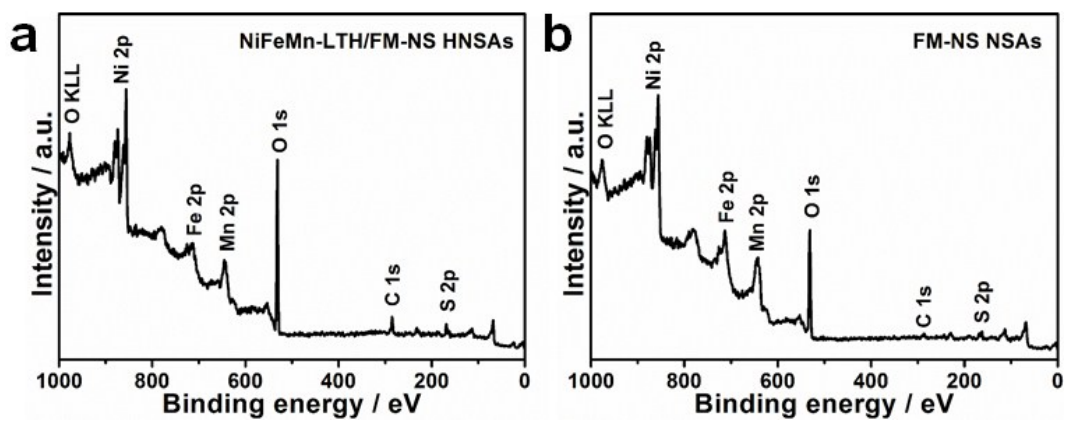

**Fig. S12** (a, b) XPS survey spectra of the as-prepared NiFeMn-LTH/FM-NS-4 HNSAs and FM-NS NSAs. The result reveals that the two are mainly composed of Ni, Fe, Mn and S elements.

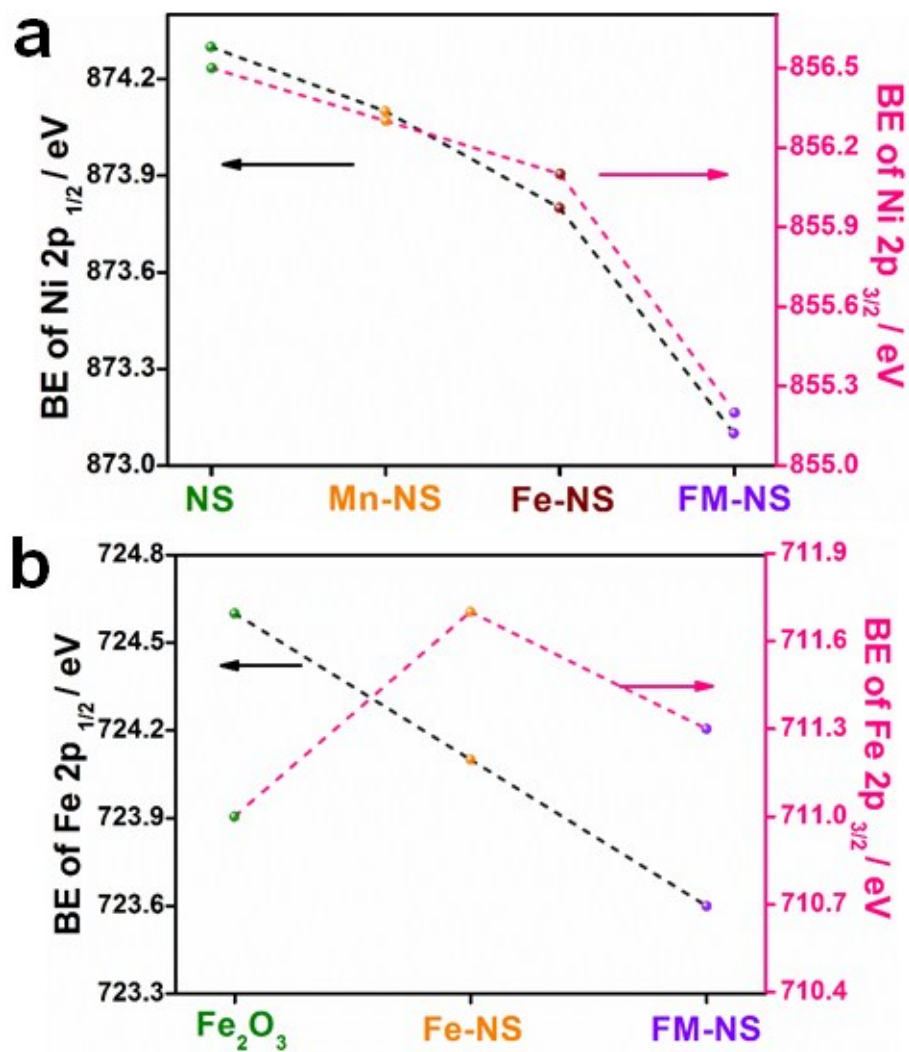

**Fig. S13** Changes in binding energy of (a) Ni 2p, (b) Fe 2p for the as-prepared FM-NS, Fe-NS, Mn-NS and pure NS NSAs catalysts, together with Fe<sub>2</sub>O<sub>3</sub> as unary metal oxide references.

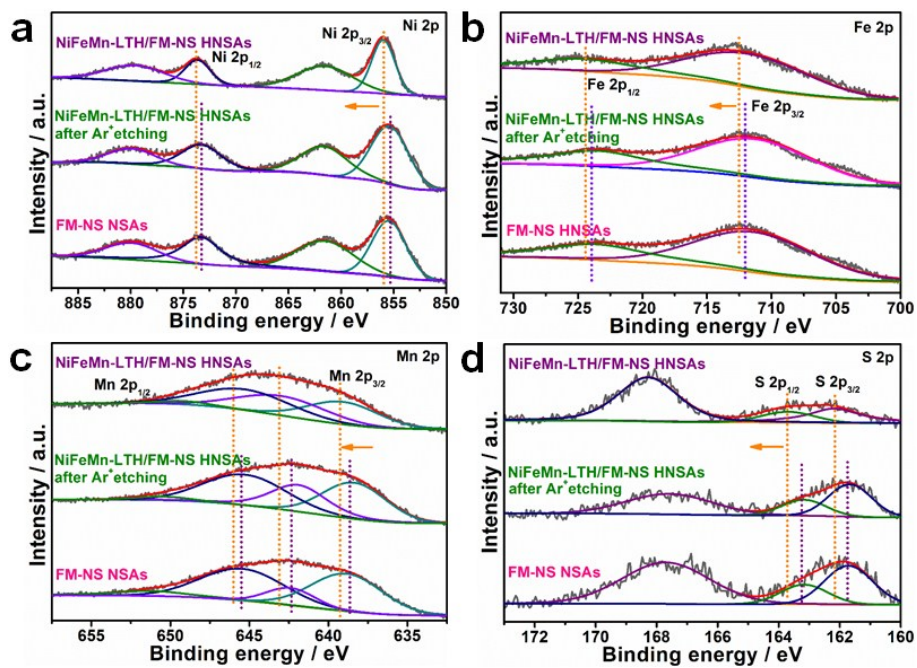

**Fig. S14** XPS spectra of (a) Ni 2p, (b) Fe 2p, (c) Mn 2p and (d) S 2p of the as-prepared NiFeMn-LTH/FM-NS-4 HNSAs before and after 60s Ar<sup>+</sup> etching and FM-NS NSAs.

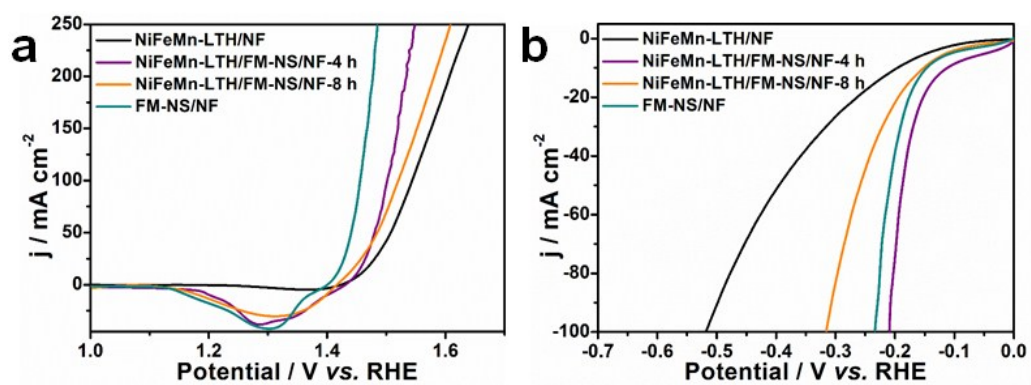

**Fig. S15** The LSV curves for (a) OER and (b) HER of the as-prepared NiFeMn-LTH, NiFeMn-LTH/FM-NS/NF-4, NiFeMn-LTH/FM-NS/NF-8 and FM-NS/NF in 1 M KOH.



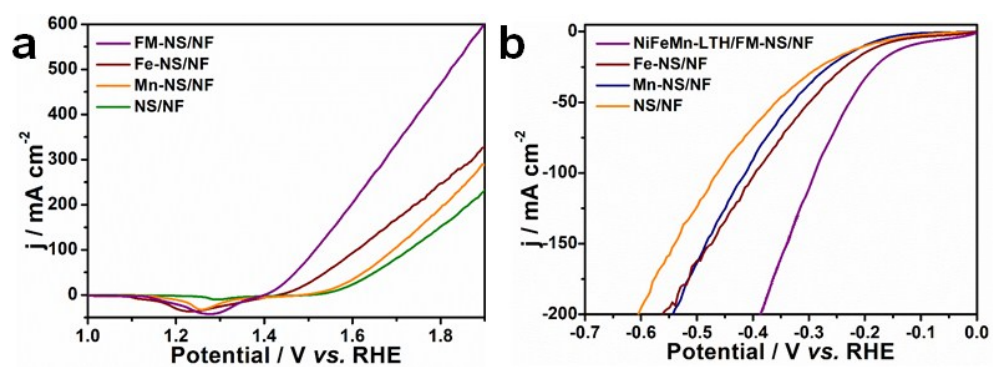

**Fig. S16** LSV curves for (a) OER and (b) HER of the as-prepared FM-NS/NF, Fe-NS/NF, Mn-NS/NF, NS/NF and NiFeMn-LTH/FM-NS/NF-4 electrodes in 1 M KOH without  $iR$ -corrected.

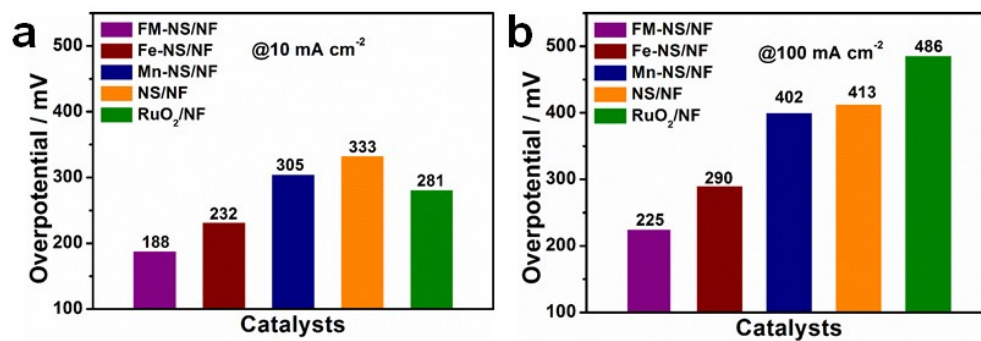

**Fig. S17** (a) OER overpotentials required for  $j=10 \text{ mA cm}^{-2}$  and (b) OER overpotentials required for  $j=100 \text{ mA cm}^{-2}$ .

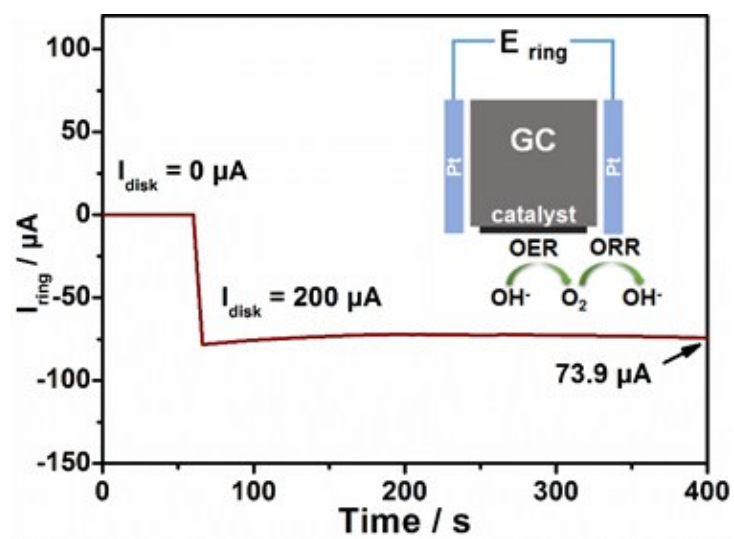

**Fig. S18** The ring current recorded on an RRDE setup in 0.1 M KOH solution at room temperature.

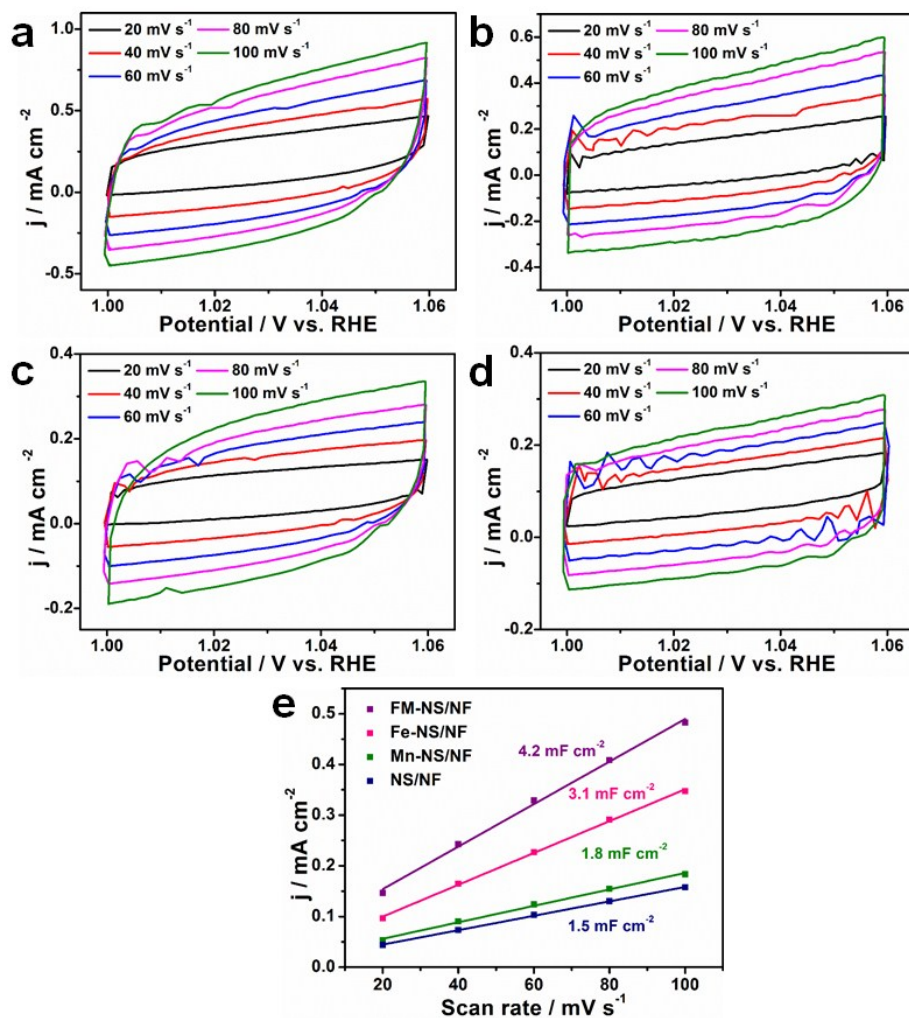

**Fig. S19** Electrochemical double-layer capacitance measurements at different scan rate (20, 40, 60, 80, 100 mV s<sup>-1</sup>) for OER in 1.0 M KOH. Cyclic voltammograms of the as-prepared (a) FM-NS/NF, (b) Fe-NS/NF, (c) Mn-NS/NF, (d) NS/NF electrodes and (e) Charging current density plots with different scan rates for OER. The linear slope, equivalent to twice the double-layer capacitance ( $C_{dl}$ ), was used to represent the ECSA.

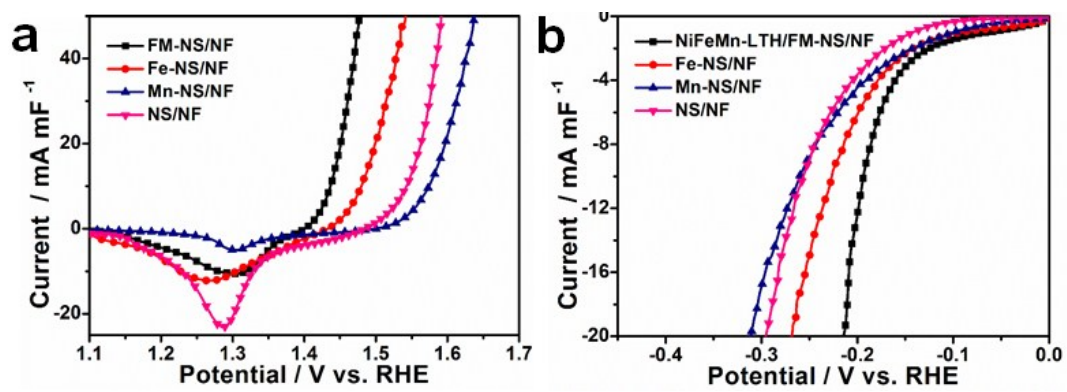

**Fig. S20** (a) OER and (b) HER polarization curves normalized by the electrochemical active surface area.

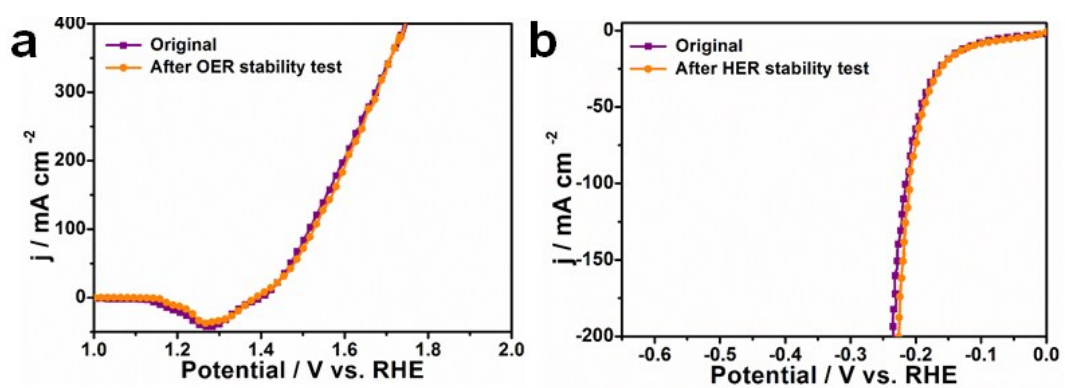

**Fig. S21** (a) OER and (b) HER polarization curves before and after 24h stability test.

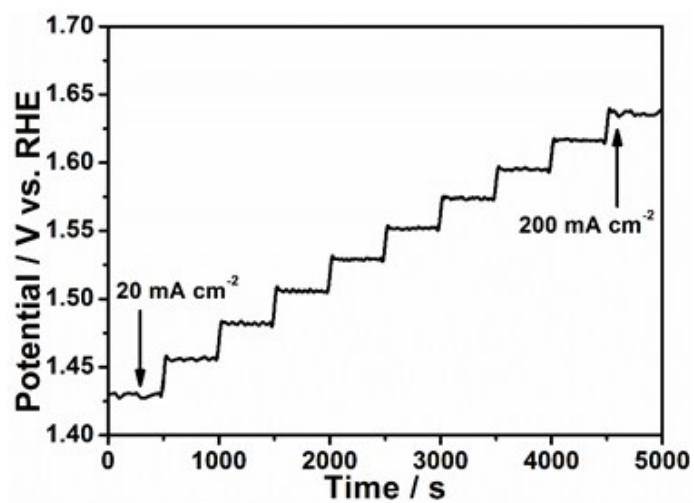

**Fig. S22** Multicurrent process of the as-prepared FM-NS/NF electrode for OER. The current density started at  $20 \text{ mA cm}^{-2}$  and ended at  $200 \text{ mA cm}^{-2}$ , with an increment of  $20 \text{ mA cm}^{-2}$  per 500 s without iR correction.

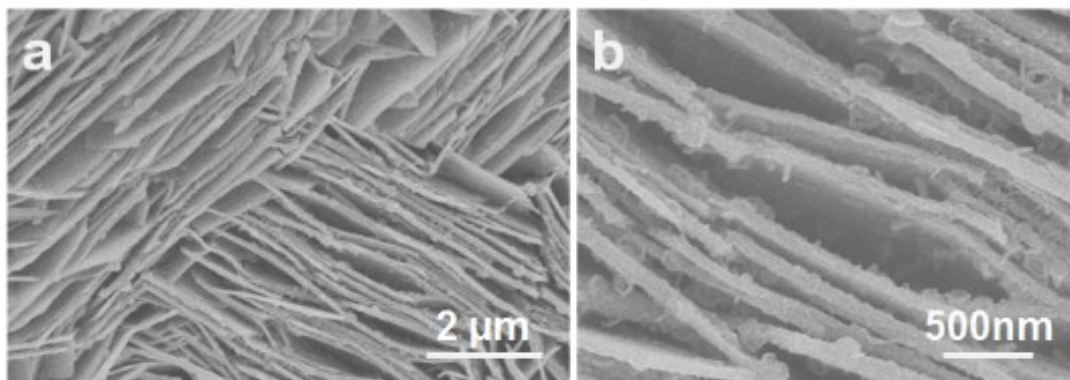

**Fig. S23** SEM images of the as-prepared FM-NS/NF electrode after OER test.



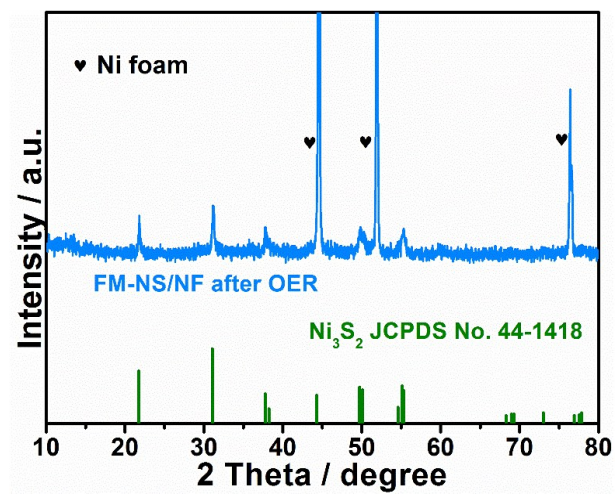

**Fig. S24** XRD pattern of the as-prepared FM-NS/NF after OER test.

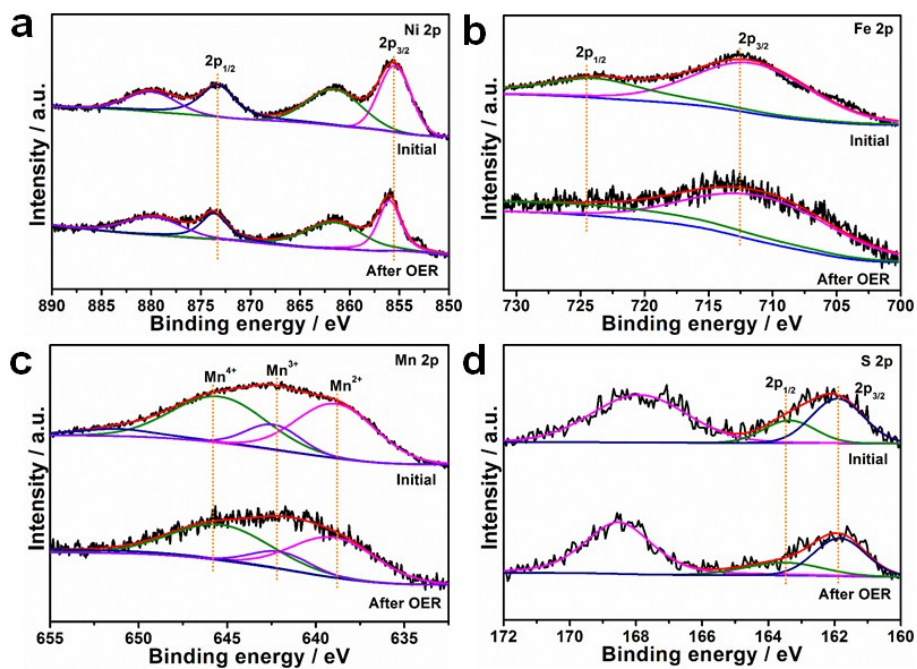

**Fig. S25** XPS spectra of (a) Ni 2p, (b) Fe 2p, (c) Mn 2p and (d) S 2p of the as-prepared FM-NS/NF before and after OER test.

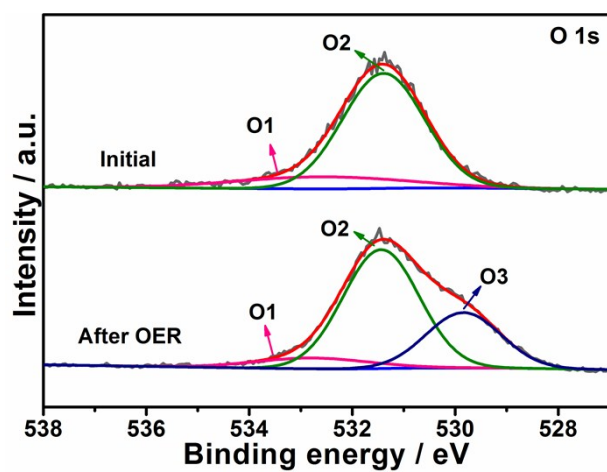

**Fig. S26** XPS spectra of O 1s of the as-prepared FM-NS/NF before and after OER test.

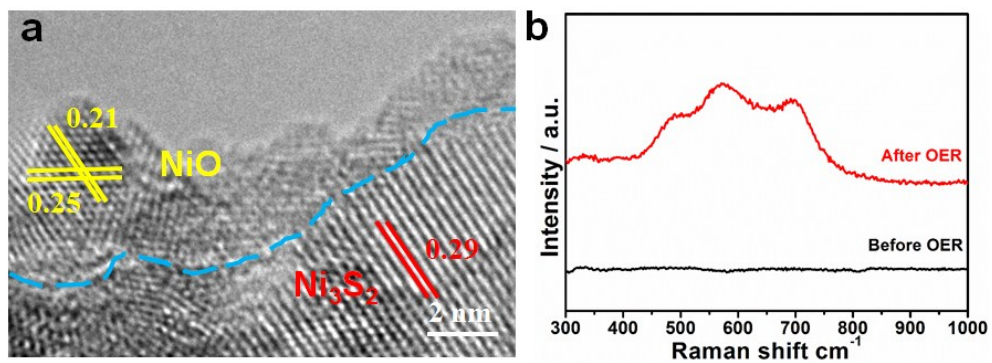

**Fig. S27** (a) HRTEM image of the as-prepared FM-NS nanosheet after OER test and (b) Raman of the as-prepared FM-NS/NF before and after OER test.

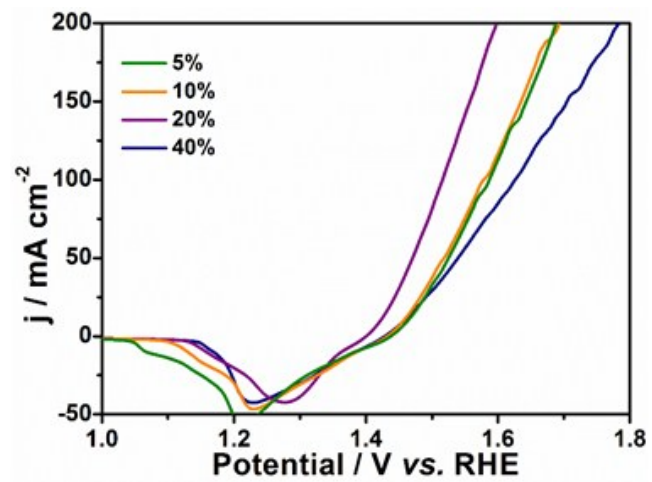

**Fig. S28** Linear sweep voltammetry curves of the as-prepared FM-NS/NF electrode with various Mn doping levels without iR-Corrected.

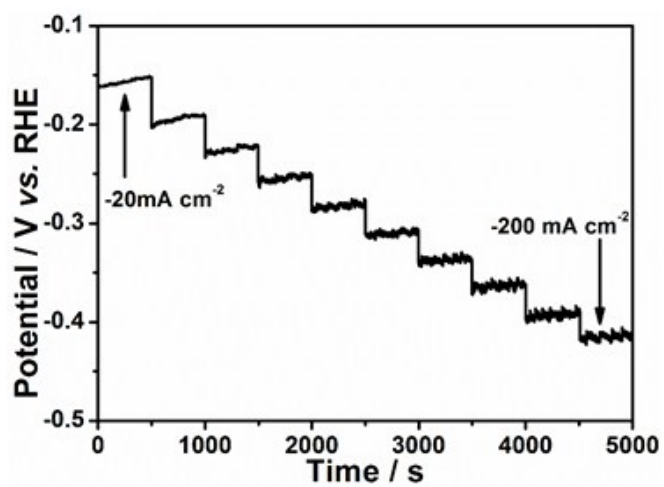

**Fig. S29** Multicurrent process of the as-prepared NiFeMn-LTH/FM-NS/NF-4 electrode for HER.

The current density started at  $-20 \text{ mA cm}^{-2}$  and ended at  $-200 \text{ mA cm}^{-2}$ , with an decrement of  $20 \text{ mA cm}^{-2}$  per  $500 \text{ s}$  without  $iR$  correction.

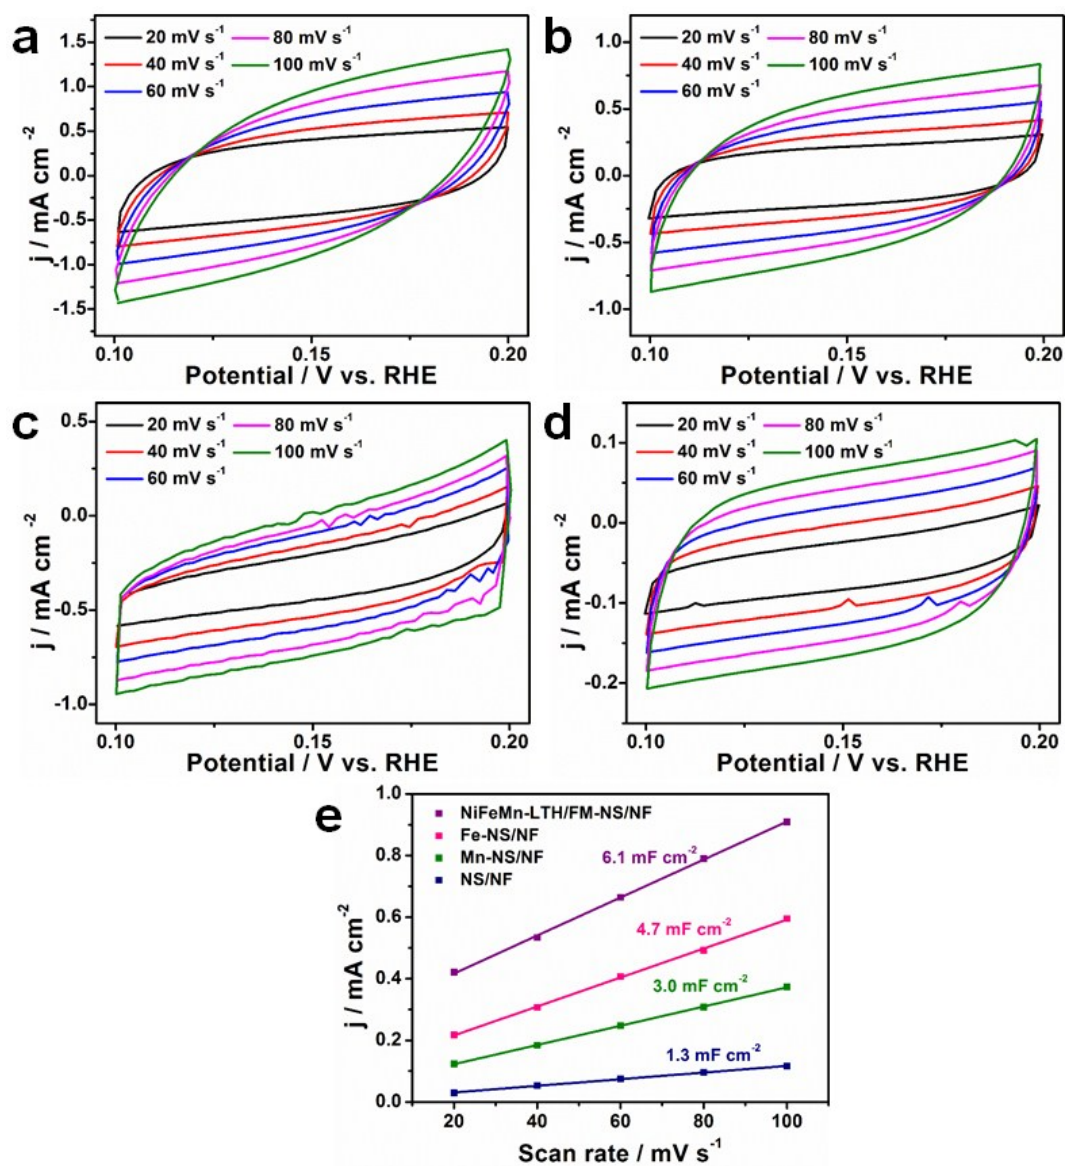

**Fig. S30** Electrochemical double-layer capacitance measurements at different scan rate (20, 40, 60, 80, 100  $\text{mV s}^{-1}$ ) for HER in 1.0 M KOH. Cyclic voltammograms of the as-prepared (a) NiFeMn-LTH/FM-NS/NF, (b) Fe-NS/NF, (c) Mn-NS/NF, (d) NS/NF electrodes and (e) Charging current density plots with different scan rates for HER. The linear slope, equivalent to twice the double-layer capacitance ( $C_{dl}$ ), was used to represent the ECSA.

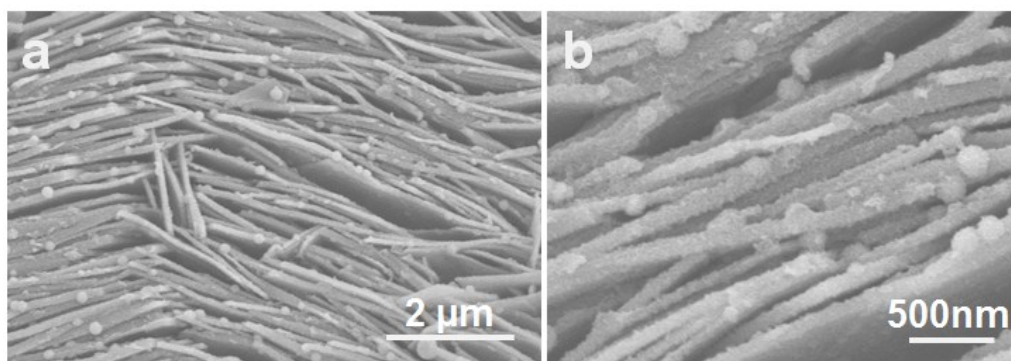

**Fig. S31** SEM images of the NiFeMn-LTH/FM-NS/NF after the HER test.



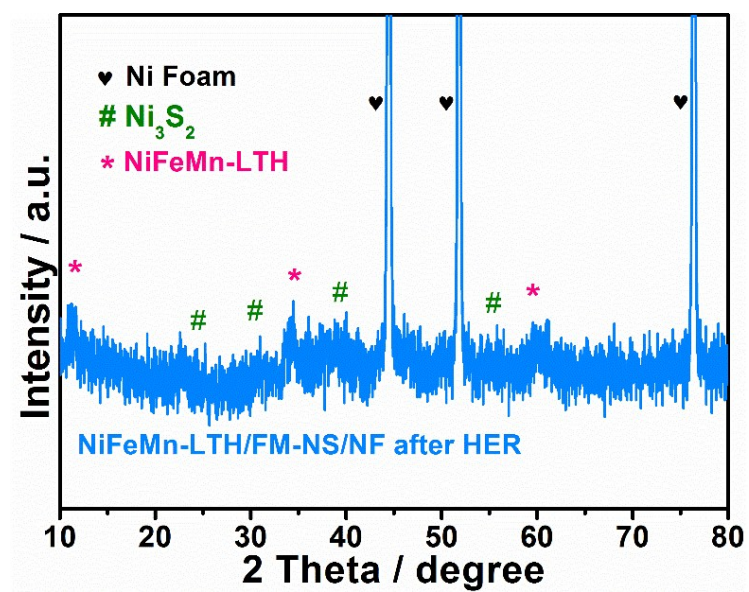

Fig. S32 XRD pattern of the NiFeMn-LTH/FM-NS/NF-4 after the HER test.

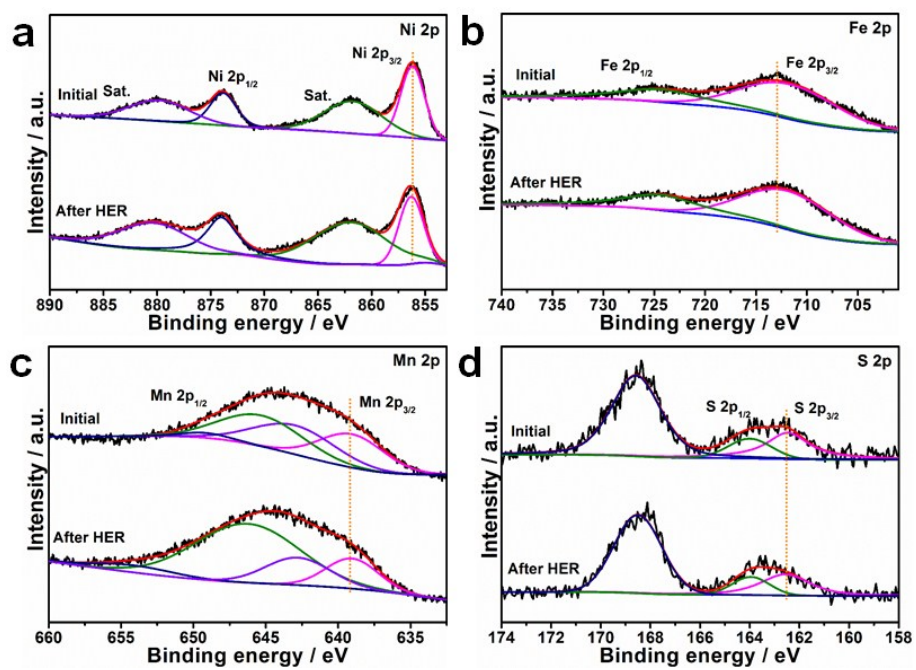

**Fig. S33** XPS spectra of (a) Ni 2p, (b) Fe 2p, (c) Mn 2p and (d) S 2p of the as-prepared NiFeMn-

LTH/FM-NS/NF before and after HER test.

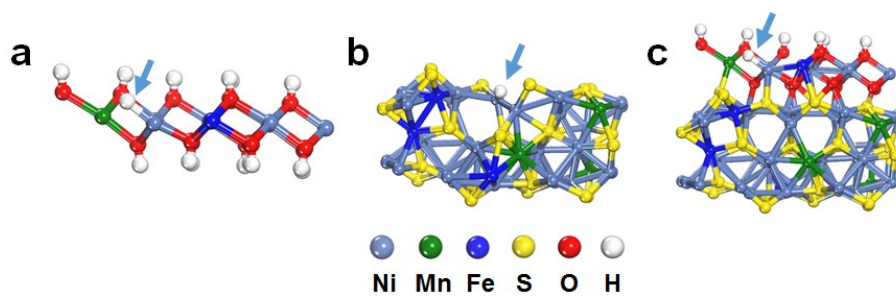

**Fig. S34** The optimized structural representations for hydrogen adsorption at (a) NiFeMn-LTH, (b) FM-NS, and (c) NiFeMn-LTH/FM-NS.

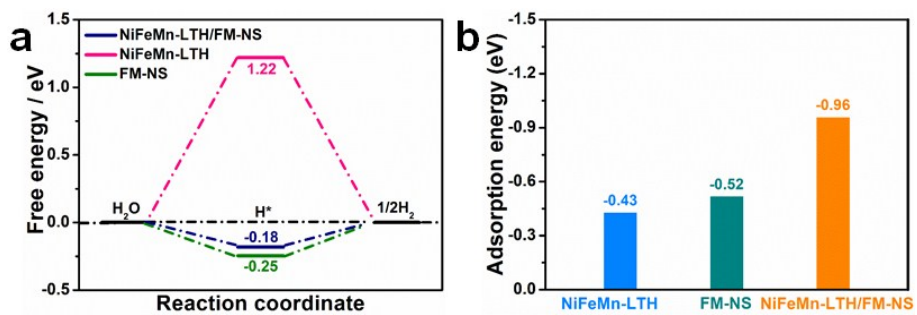

**Fig. S35** (a) Gibbs free-energy diagram for H adsorption and (b) Adsorption energy for H<sub>2</sub>O on the NiFeMn-LTH, FM-NS, and NiFeMn-LTH/FM-NS.

**Table S1.** Comparison of OER performances of as-prepared FM-NS/NF with other transition-metal catalysts in 1 M KOH solutions.

| Catalysts                                                     | $\eta_{10}$ / mV vs. | Tafel slope / mV  | Ref.      |
|---------------------------------------------------------------|----------------------|-------------------|-----------|
|                                                               | RHE                  | dec <sup>-1</sup> |           |
| FM-NS/NF                                                      | 188                  | 47                | This work |
| Fe <sub>0.09</sub> Co <sub>0.13</sub> -NiSe <sub>2</sub> /CFC | 251                  | 63                | 1         |
| Fe-CoP HTPAs/NF                                               | 230                  | 69                | 2         |
| CoP-FeP/CC                                                    | 250                  | 131               | 3         |
| Cu <sub>0.3</sub> Co <sub>2.7</sub> P/NC                      | 190                  | 44                | 4         |
| Co/CoP                                                        | 340                  | 79.5              | 5         |
| MoS <sub>2</sub> /Ni <sub>3</sub> S <sub>2</sub> /NF          | 218                  | 88                | 6         |
| NiFeV LDHs/NF                                                 | 195                  | 42                | 7         |
| Ni <sub>2</sub> P-Ni <sub>3</sub> S <sub>2</sub> HNAs/NF,     | 210                  | 62                | 8         |
| NiFe-LDH/NF                                                   | 255                  | 50                | 9         |
| NiFeRu-LDH/NF                                                 | 225                  | 32                | 10        |

**Table S2.** Catalyst mass loading and Turnover frequency (TOF) of all used catalysts.

|                  | <b>Mass loading (</b><br><b>mg cm<sup>-2</sup>)</b> | <b>TOF at <math>\eta =</math></b><br><b>300 mV (s<sup>-1</sup>)</b><br><b>(OER)</b> | <b>TOF at <math>\eta =</math></b><br><b>-300 mV (s<sup>-1</sup>)</b><br><b>(HER)</b> |
|------------------|-----------------------------------------------------|-------------------------------------------------------------------------------------|--------------------------------------------------------------------------------------|
| FM-NS/NF         | 0.91                                                | 0.138                                                                               | /                                                                                    |
| NFM-LTH/FM-NS/NF | 0.93                                                | /                                                                                   | 0.30                                                                                 |
| Fe-NS/NF         | 1.01                                                | 0.042                                                                               | 0.082                                                                                |
| Mn-NS/NF         | 1.08                                                | 0.003                                                                               | 0.053                                                                                |
| NS/NF            | 1.15                                                | 0.002                                                                               | 0.021                                                                                |

**Table S3.** The corresponding EIS parameters for OER of the as-prepared FM-NS/NF, Fe-NS/NF, Mn-NS/NF and NS/NF electrodes.

|                                    | <b>FM-NS/NF</b> | <b>Fe-NS/NF</b> | <b>Mn-NS/NF</b> | <b>NS/NF</b> |
|------------------------------------|-----------------|-----------------|-----------------|--------------|
| $R_s$ ( $\Omega \text{ cm}^2$ )    | 1.01            | 1.07            | 1.08            | 1.20         |
| $R_{ct}$ ( $\Omega \text{ cm}^2$ ) | 2.27            | 92.2            | 67.3            | 354.5        |
| CPE1-T                             | 1.37            | 1.16            | 0.45            | 0.48         |
| CPE1-P                             | 0.66            | 0.41            | 0.61            | 0.67         |

**Table S4.** Comparison of HER performances of as-prepared NiFeMn-LTH/FM-NS/NF-4 with other transition-metal catalysts in 1 M KOH solutions.

| Catalysts                                                               | $\eta_{10}$ / mV vs. RHE | Tafel slope / mV<br>dec <sup>-1</sup> | Ref.      |
|-------------------------------------------------------------------------|--------------------------|---------------------------------------|-----------|
| NiFeMn-LTH/FM-NS/NF-4                                                   | 110                      | 80                                    | This work |
| NixCo <sub>3-x</sub> S <sub>4</sub> /Ni <sub>3</sub> S <sub>2</sub> /NF | 160                      | 95                                    | 11        |
| Co <sub>1</sub> -Fe <sub>1</sub> -B-P                                   | 173                      | 96                                    | 12        |
| Mn-Ni <sub>3</sub> S/NF                                                 | 152                      | 98                                    | 13        |
| Co <sub>1</sub> Mn <sub>1</sub> CH/NF                                   | 180                      | /                                     | 14        |
| Ni@N <sub>0.19</sub> /NF                                                | 42                       | 89                                    | 15        |
| Ni <sub>3</sub> S <sub>2</sub> @NiV-LDH/NF                              | 126                      | 90                                    | 16        |
| Cu <sub>3</sub> P-Co <sub>2</sub> P /NF                                 | 115                      | 65                                    | 17        |
| NiCo <sub>2</sub> S <sub>4</sub> NW/NF                                  | 210                      | 59                                    | 18        |



**Table S5.** The corresponding EIS parameters for HER of the as-prepared NiFeMn-LTH/FM-NS/NF-4, Fe-NS/NF, Mn-NS/NF, NS/NF electrodes.

|                                       | <b>NiFeMn-LTH/<br/>FM-NS/NF-4</b> | <b>Fe-NS/NF</b> | <b>Mn-NS/NF</b> | <b>NS/NF</b> |
|---------------------------------------|-----------------------------------|-----------------|-----------------|--------------|
| $R_s$ ( $\Omega$ cm <sup>2</sup> )    | 1.02                              | 1.03            | 1.21            | 1.04         |
| $R_{ct}$ ( $\Omega$ cm <sup>2</sup> ) | 2.89                              | 3.83            | 8.23            | 14.12        |
| CPE1-T                                | 1.17                              | 0.11            | 0.02            | 0.02         |
| CPE1-P                                | 2.93                              | 0.67            | 0.72            | 0.71         |

**Table S6.** Overall water splitting performances of our samples compared with recently reported transition-metal catalysts in alkaline.

| Catalysts                                                                            | Potential (V) at 10 mA cm <sup>-2</sup> | Ref.      |
|--------------------------------------------------------------------------------------|-----------------------------------------|-----------|
| FM-NS/NF // NiFeMn-LTH/FM-NS/NF-4                                                    | 1.48                                    | This work |
| MoS <sub>2</sub> /Ni <sub>3</sub> S <sub>2</sub> /NF                                 | 1.56                                    | 6         |
| Ni <sub>x</sub> Co <sub>3-x</sub> S <sub>4</sub> /Ni <sub>3</sub> S <sub>2</sub> /NF | 1.53                                    | 9         |
| Ni <sub>3</sub> S <sub>2</sub> @NiV-LDH/NF                                           | 1.53                                    | 16        |
| CoMoNiS-NF-31                                                                        | 1.54                                    | 19        |
| NiFe-LDH@NiCu                                                                        | 1.50                                    | 20        |
| CoTeNR/NF                                                                            | 1.64                                    | 21        |
| Fe-Ni <sub>3</sub> S <sub>2</sub> /NF                                                | 1.54                                    | 22        |
| Co <sub>3</sub> S <sub>4</sub> /EC-MOF/NF                                            | 1.55                                    | 23        |

## References

1. Y. Sun, K. Xu, Z. Wei, H. Li, T. Zhang, X. Li, W. Cai, J. Ma, H. J. Fan and Y. Li, *Adv. Mater.*, 2018, **30**, e1802121.
2. E. Hu, J. Ning, D. Zhao, C. Xu, Y. Lin, Y. Zhong, Z. Zhang, Y. Wang and Y. Hu, *Small*, 2018, **14**, e1704233.
3. Z. Niu, C. Qiu, J. Jiang and L. Ai, *ACS Sustain. Chem. Eng.*, 2018, **7**, 2335-2342.
4. J. Song, C. Zhu, B. Z. Xu, S. Fu, M. H. Engelhard, R. Ye, D. Du, S. P. Beckman and Y. Lin, *Adv. Energy Mater.*, 2017, **7**, 1601555.
5. Z. H. Xue, H. Su, Q. Y. Yu, B. Zhang, H. H. Wang, X. H. Li and J. S. Chen, *Adv. Energy Mater.*, 2017, **7**, 1602355.
6. J. Zhang, T. Wang, D. Pohl, B. Rellinghaus, R. Dong, S. Liu, X. Zhuang and X. Feng,

- Angew. Chem. Int. Ed. Engl.*, 2016, **55**, 6702-6707.
7. P. S. Li, X. X. Duan, Y. Kuang, Y. P. Li, G. X. Zhang, W. Liu and X. M. Sun, *Adv. Energy Mater.*, 2018, **8**, 1703341.
  8. L. Y. Zeng, K. A. Sun, X. B. Wang, Y. Q. Liu, Y. Pan, Z. Liu, D. W. Cao, Y. Song, S. H. Liu and C. G. Liu, *Nano Energy*, 2018, **51**, 26-36.
  9. Z. Lu, W. Xu, W. Zhu, Q. Yang, X. Lei, J. Liu, Y. Li, X. Sun and X. Duan, *Chem. Commun.*, 2014, **50**, 6479-6482.
  10. G. Chen, T. Wang, J. Zhang, P. Liu, H. Sun, X. Zhuang, M. Chen and X. Feng, *Adv. Mater.*, 2018, **30**, 1706279.
  11. Y. Wu, Y. Liu, G.-D. Li, X. Zou, X. Lian, D. Wang, L. Sun, T. Asefa and X. Zou, *Nano Energy*, 2017, **35**, 161-170.
  12. Z. Wu, D. Nie, M. Song, T. Jiao, G. Fu and X. Liu, *Nanoscale*, 2019, **11**, 7506-7512.
  13. H. Du, R. Kong, F. Qu and L. Lu, *Chem. Commun.*, 2018, **54**, 10100-10103.
  14. T. Tang, W. J. Jiang, S. Niu, N. Liu, H. Luo, Y. Y. Chen, S. F. Jin, F. Gao, L. J. Wan and J. S. Hu, *J. Am. Chem. Soc.*, 2017, **139**, 8320-8328.
  15. Y. Li, X. Tan, S. Chen, X. Bo, H. Ren, S. C. Smith and C. Zhao, *Angew. Chem. Int. Ed. Engl.*, 2019, **58**, 461-466.
  16. Q. Liu, J. Huang, Y. Zhao, L. Cao, K. Li, N. Zhang, D. Yang, L. Feng and L. Feng, *Nanoscale*, 2019, **11**, 8855-8863.
  17. L. Liu, L. Ge, Y. Sun, B. Jiang, Y. Cheng, L. Xu, F. Liao, Z. Kang and M. Shao, *Nanoscale*, 2019, **11**, 6394-6400.
  18. A. Sivanantham, P. Ganesan and S. Shanmugam, *Adv. Funct. Mater.*, 2016, **26**, 4661-4672.
  19. Z. Yuan, J. Li, M. Yang, Z. Fang, J. Jian, D. Yu, X. Chen and L. Dai, *J. Am. Chem. Soc.*, 2019, **141**, 4972-4979.
  20. Y. Zhou, Z. Wang, Z. Pan, L. Liu, J. Xi, X. Luo and Y. Shen, *Adv. Mater.*, 2019, **31**, e1806769.
  21. L. Yang, H. Xu, H. Liu, D. Cheng and D. Cao, *Small Methods*, 2019, **3**, 1900113.
  22. G. Zhang, Y. S. Feng, W. T. Lu, D. He, C. Y. Wang, Y. K. Li, X. Y. Wang and F. F. Cao,

*ACS Catal.*, 2018, **8**, 5431.

23. T. Liu, P. Li, N. Yao, T. Kong, G. Cheng, S. Chen and W. Luo, *Adv. Mater.*, 2019, **31**, e1806672.
